# Supplementary material for: Screening and bioinformatics analysis of a potential ceRNA network in melatonin-induced cashmere growth in Liaoning cashmere goats
Source: Copernicus journal article supplement (doi:10.5194/aab-67-97-2024), 2024-02-21
Supplement: Supplementary file 1 [file aab-67-97-2024-supplement.zip]

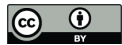

## *Supplement of*

# **Screening and bioinformatics analysis of a potential ceRNA network in melatonin-induced cashmere growth in Liaoning cashmere goats**

**Mei Jin et al.**

*Correspondence to:* Mei Jin (jm6688210@163.com)

- aab-67-97-2024-supplement-title-page.pdf
- Table S1. 12 key mRNAs from the ceRNA network.xlsx

The copyright of individual parts of the supplement might differ from the article licence.
