# Supplementary material for: Screening and bioinformatics analysis of a potential ceRNA network in melatonin-induced cashmere growth in Liaoning cashmere goats
Source: Arch Anim Breed. 2024 Feb 21;67(1):97–109. doi: 10.5194/aab-67-97-2024 (PMC12922166; doi:10.5194/aab-67-97-2024)
Supplement: The supplement related to this article is available online at: https://doi.org/10.5194/aab-67-97-2024-supplement. [file aab-67-97-2024-supplement.zip › Table S1. 12 key mRNAs from the ceRNA network.xlsx]

## Sheet: Sheet1
Table S1. 12 key mRNAs from the ceRNA network
Gene	mRNA id	P value	log2FoldChange	miRNA	lncRNA
CREB1	XM_005676431.3	3.39e-05	13.17	chi-miR-34c-5p	MSTRG.11415.3
				chi-miR-195-5p
PIK3C3	XM_005696969.3	9.69e-08	15.89	chi-miR-34c-3p	MSTRG.17340.4
				chi-miR-34c-5p
AGAP3	XM_018046715.1	9.51e-14	2.56	chi-miR-195-5p	MSTRG.28114.20
MEF2A	XM_018065830.1	3.36e-06	13.14	chi-miR-34c-5p	MSTRG.28114.20
ASAP2	XM_018055685.1	2.27e-08	15.75	chi-miR-34c-5p	MSTRG.16913.1
IRAG1	XM_018059536.1	1.63e-06	13.2	chi-miR-34c-5p	MSTRG.28630.12
					MSTRG.28114.11
PNISR	XM_005684651.3	0.00143	4.53	chi-miR-34c-3p	MSTRG.28114.20
PIP5K1A	XM_005677614.3	1.55e-06	14.05	chi-miR-34c-5p	MSTRG.27945.11
					MSTRG.28660.14
					MSTRG.28099.7
					MSTRG.28116.6
SRSF11	XM_018045450.1	1.09e-06	14.53	chi-miR-195-5p	MSTRG.27945.11
					MSTRG.28660.14
				chi-miR-34c-5p	MSTRG.28099.7
					MSTRG.28116.6
ZRANB2	XR_001295506.2	2.28e-06	13.98	chi-miR-34c-5p	MSTRG.27945.11
					MSTRG.28660.14
					MSTRG.11415.3
					MSTRG.28116.6
RBM39	XM_018057788.1	1.21e-07	15.68	chi-miR-34c-3p	MSTRG.27945.22
					MSTRG.28099.7
	XM_018057791.1	2.11e-06	15.83		MSTRG.27945.11
					MSTRG.28660.14
					MSTRG.28116.6
CBL	XM_018059664.1	0.000441	7.7	chi-miR-34c-3p	MSTRG.28660.6
					MSTRG.28117.16
					MSTRG.28575.3
					MSTRG.28407.10
